# Supplementary material for: Tuning of multifunctional Cu-doped ZnO films and nanowires for enhanced piezo/ferroelectric-like and gas/photoresponse properties
Source: Royal Society of Chemistry journal article supplement (doi:10.1039/c3nr05034c), 2013-11-22
Supplement: c3nr05034c.pdf [file c3nr05034c.pdf]

# Tuning of Multifunctional Cu-doped ZnO Films and Nanowires for Enhanced Piezo/Ferroelectric-like and Gas/Photoresponse Properties

Wei Li Ong<sup>1</sup>, Hejin Huang<sup>2</sup>, Juanxiu Xiao<sup>3</sup>, Kaiyang Zeng<sup>3</sup>, and Ghim Wei Ho<sup>1,\*</sup>

<sup>1</sup> Department of Electrical and Computer Engineering, National University of Singapore, Singapore 117576, Singapore

<sup>2</sup> Engineering Science Programme, National University of Singapore, Singapore 117576, Singapore

<sup>3</sup> Department of Mechanical Engineering, National University of Singapore, Singapore 117576, Singapore

\*Corresponding Author Email: elehgw@nus.edu.sg

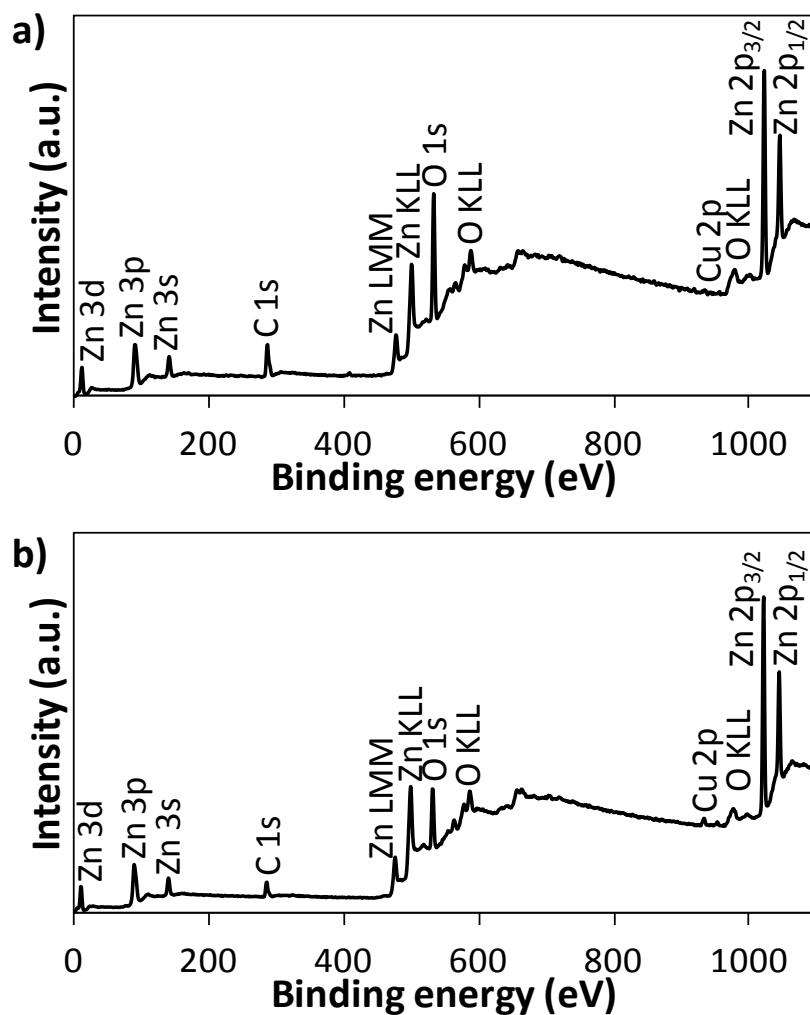

**Fig. S1.** Survey XPS spectra of (a) 5% and (b) 10% Cu-ZnO films.

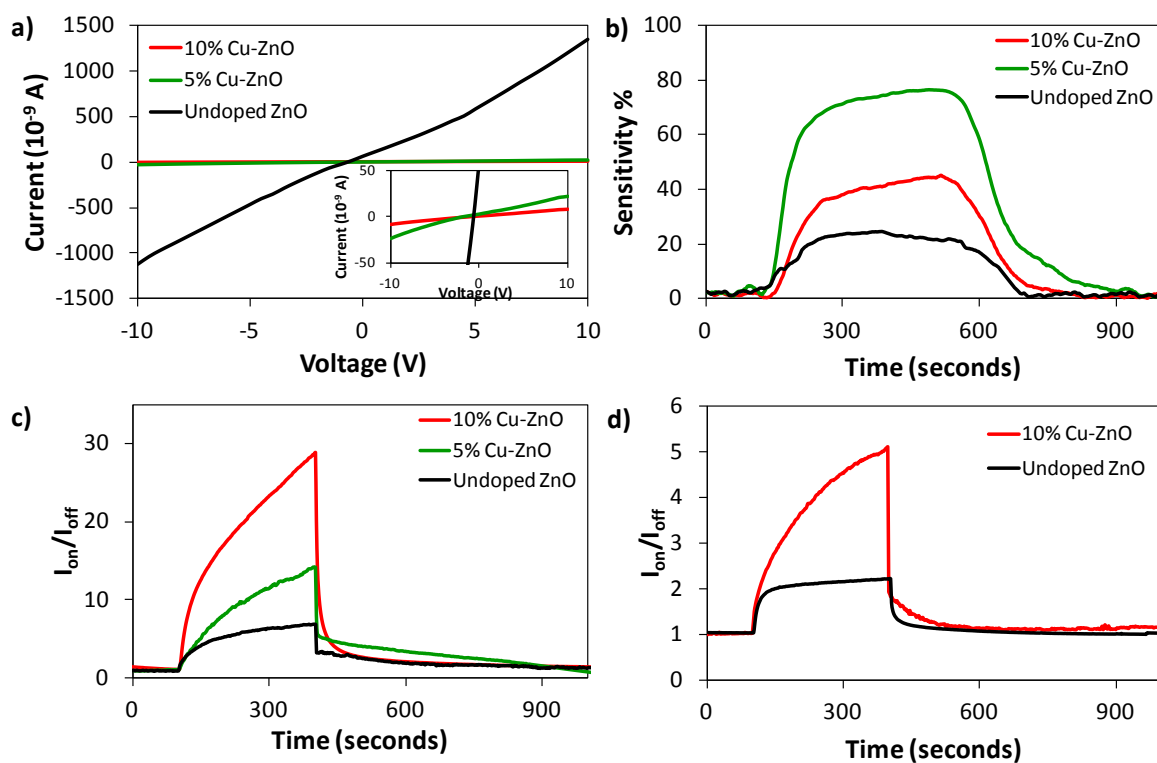

**Fig. S2.** a) I-V plot of pristine and Cu-doped ZnO films in dark conditions. Inset shows a magnified view of the IV curve. b) Hydrogen gas sensing (500 ppm) of pristine and Cu-doped ZnO films at room temperature. c) UV sensing of pristine and Cu-doped ZnO films. d) White light sensing of pristine and 10% Cu-ZnO film.

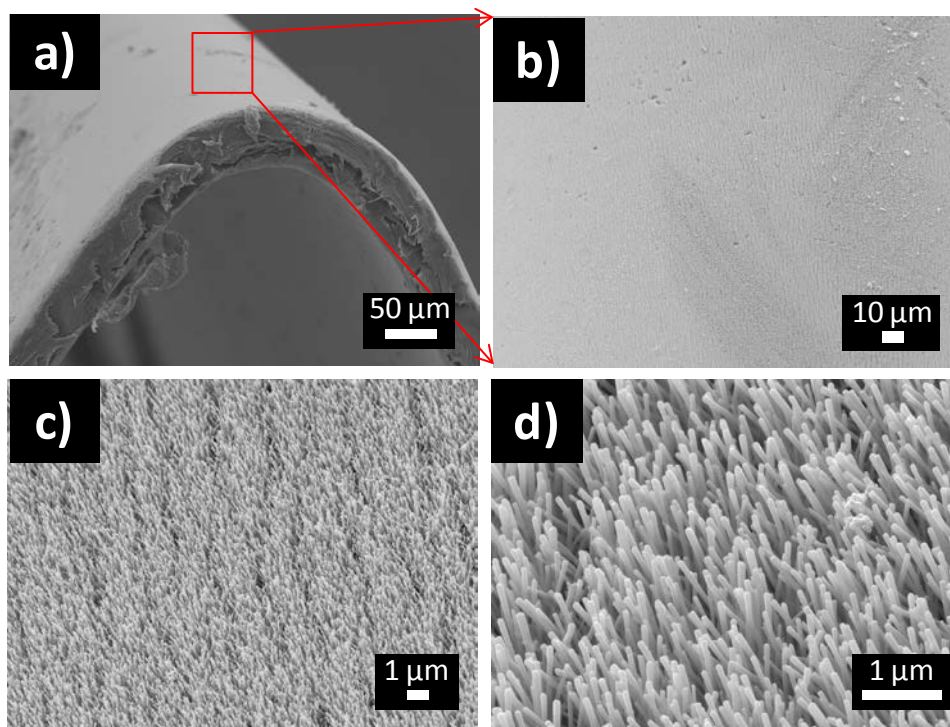

**Fig. S3.** a) Cross-section SEM image of a bent sample of ZnO nanowires synthesized on PET substrate. b-d) SEM images of the region outlined by a red box at higher magnifications.

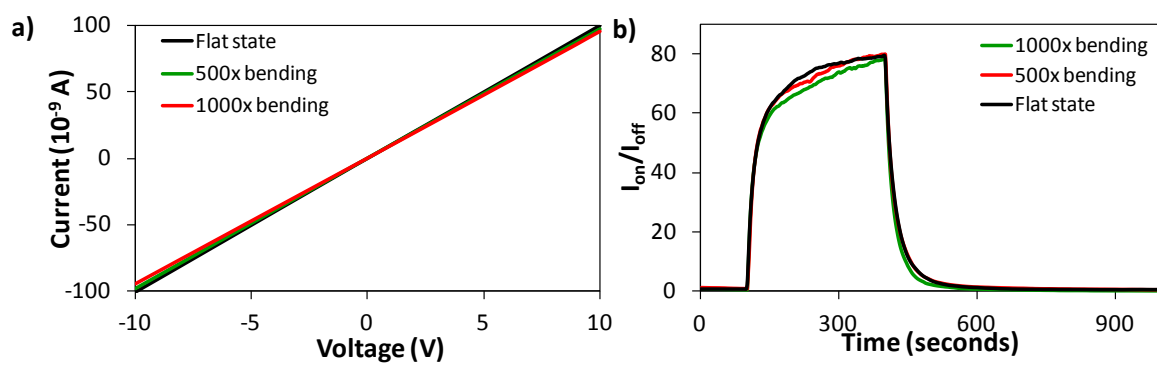

**Fig. S4.** a) I-V plot of 10% Cu-ZnO nanowires in a flat state and after 500 and 1000 times of bending.  
b) UV sensing of flat and bent 10% Cu-ZnO nanowires.
